# Supplementary material
Source: PubMed Central journal article supplement (PMC5656977)
Supplement: nn7b03150_si_001.pdf [file nn7b03150_si_001.pdf]

Supporting information

## ***In Situ* Imaging of Tissue Remodeling with Collagen Hybridizing Peptides**

Jeongmin Hwang,<sup>†,¶</sup> Yufeng Huang,<sup>‡</sup> Timothy J. Burwell,<sup>§</sup> Norman C. Peterson,<sup>§</sup> Jane Connor,<sup>§</sup> Stephen J. Weiss,<sup>⊥</sup> S. Michael Yu,<sup>†,¶,¶</sup> and Yang Li<sup>\*,†,¶</sup>

### **Affiliations:**

<sup>†</sup>Department of Bioengineering and <sup>¶</sup>Department of Pharmaceutics and Pharmaceutical Chemistry, University of Utah, Salt Lake City, Utah 84112, United States

<sup>¶</sup>3Helix Inc, Salt Lake City, Utah 84117, United States

<sup>‡</sup>Division of Nephrology and Hypertension, Department of Internal Medicine, University of Utah School of Medicine, Salt Lake City, Utah 84132, United States

<sup>§</sup>MedImmune LLC, Gaithersburg, Maryland 20878, United States

<sup>⊥</sup>Division of Molecular Medicine & Genetics, Department of Internal Medicine, and the Life Sciences Institute, University of Michigan, Ann Arbor, Michigan 48109, United States

\*Address correspondence to:

Yang Li, 36 S Wasatch Drive, SMBB 3100, Salt Lake City, Utah 84112, USA.

Phone: 801.587.0215;

E-mail: yang.d.li@utah.edu.

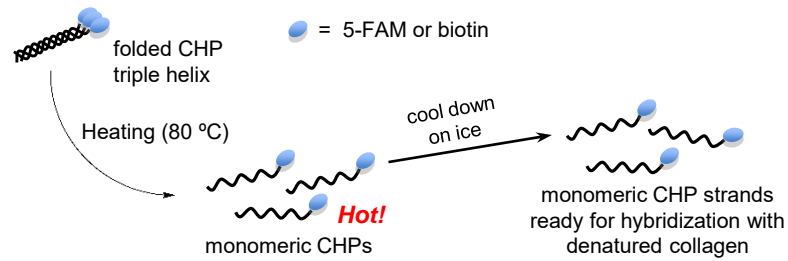

**Figure S1.** The thermal activation step used to generate monomeric CHP strands for collagen hybridization. A dilute CHP solution (15-30  $\mu\text{M}$ ) was heated in a water bath at 80 °C for 5 min to dissociate the folded CHP homotrimers. The hot solution was then quenched in an ice-water bath for 15-90 s (depending on the volume) to room temperature. The solution of monomeric CHP was then ready for immediate use to hybridize with denatured collagen in tissue samples. The self-trimerizing of CHP takes several hours to complete in this concentration range, and the effect of the dead time due to quenching (< 2 min) is negligible.

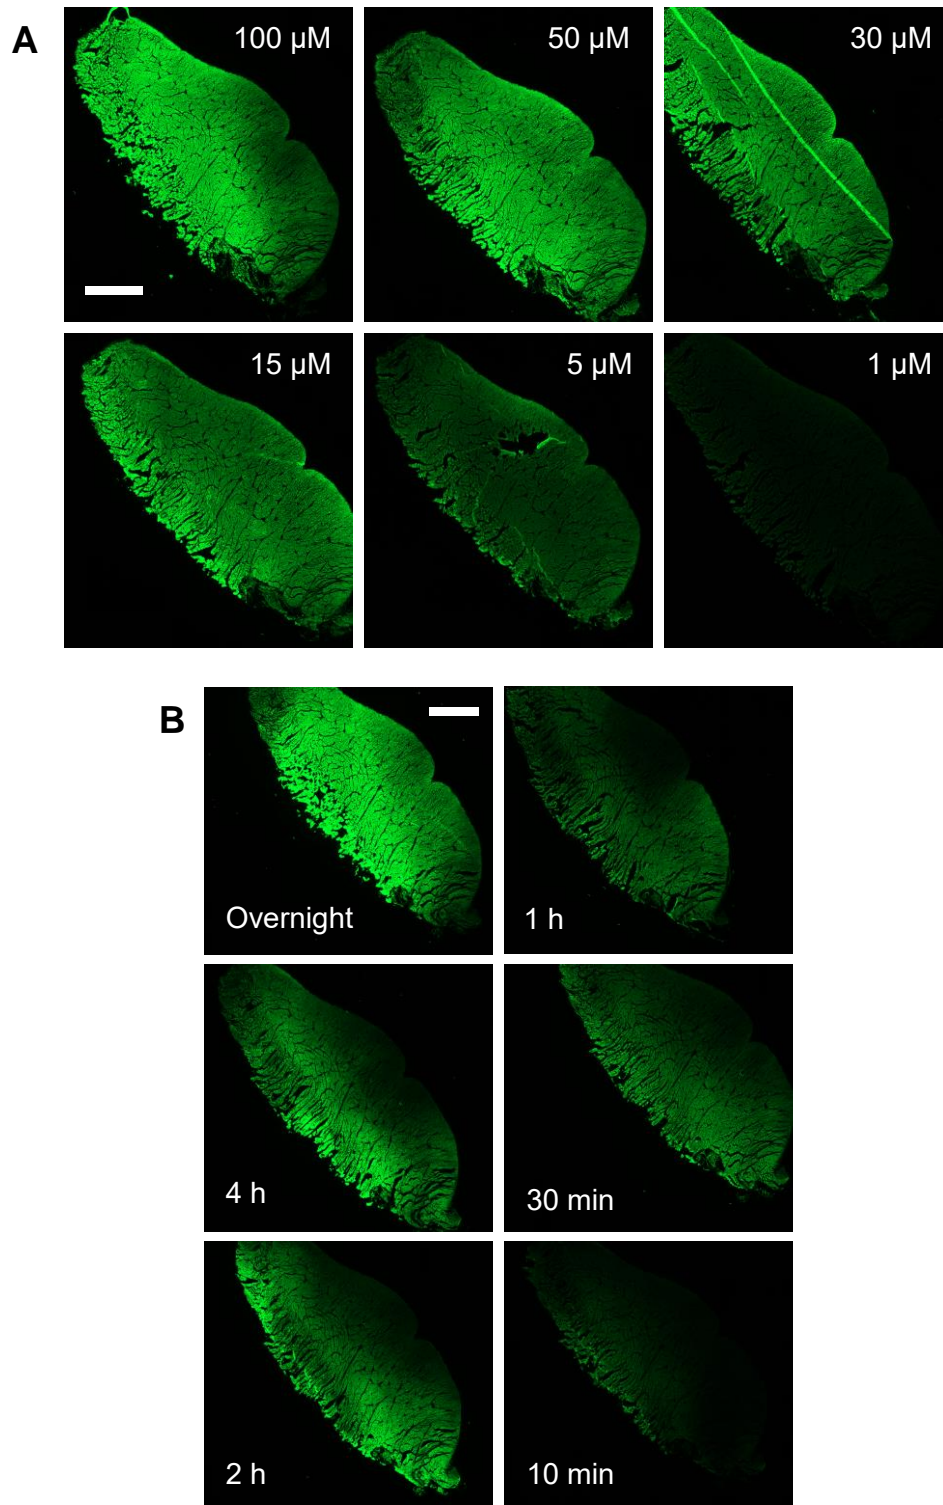

**Figure S2.** (A) Fluorescence images of neighboring cryosections of a porcine ligament thermally denatured in 80 °C water and subsequently stained with 100  $\mu$ L of F-CHP solutions at varying concentrations are shown. The staining time was set at 2 h for all samples. (B) Fluorescence images of a set of heated ligament tissue stained with F-CHP (100  $\mu$ L, 15  $\mu$ M) for different incubation time periods are shown. Scale bars: 2 mm.

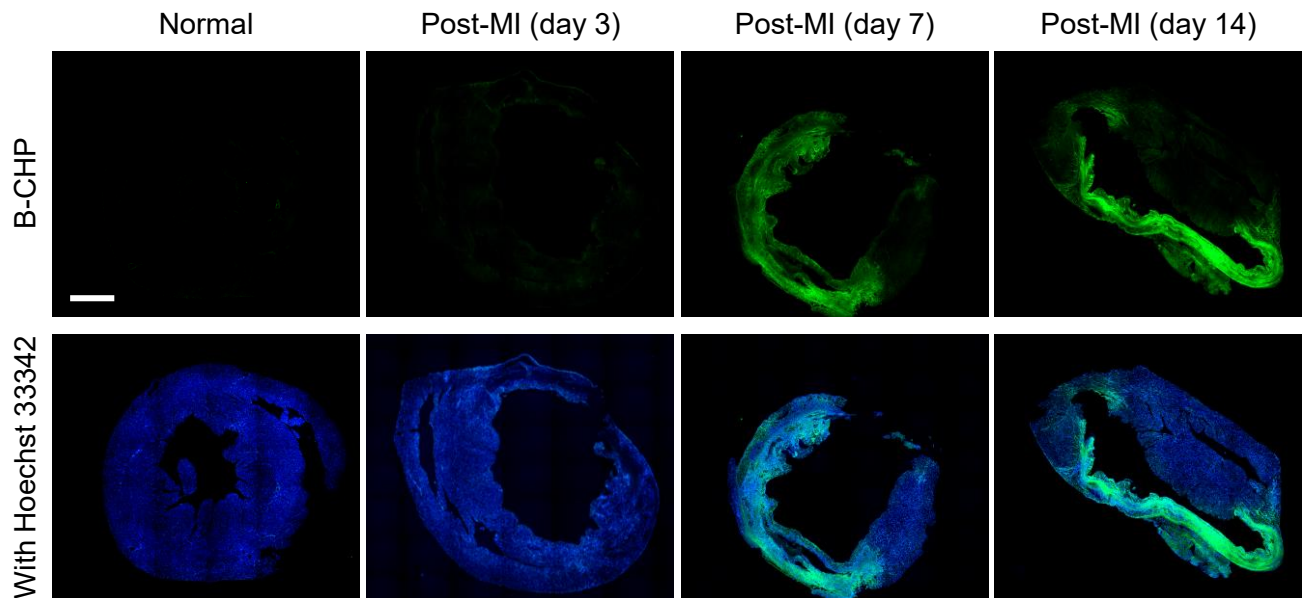

**Figure S3.** Representative fluorescence scans of axial cross-sections of fixed and paraffin-embedded mouse hearts before (normal), and at three time points after myocardial infarction that were stained with Hoechst 33342 and B-CHP (detected by AlexaFluor647-streptavidin). Scale bar: 1 mm.

Glomerulonephritis

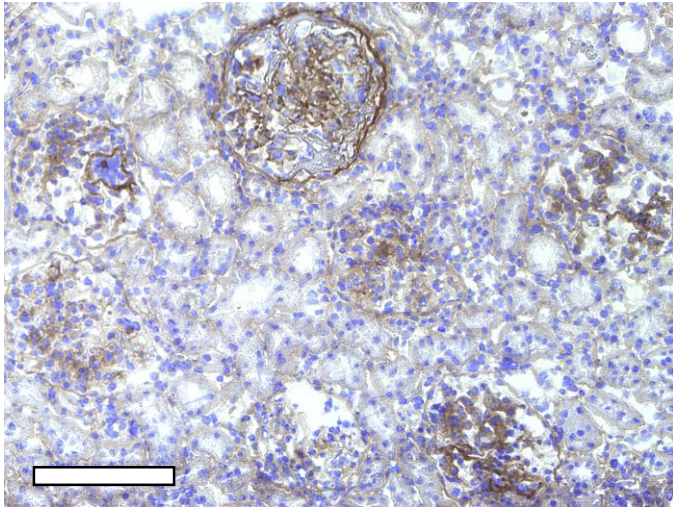

Normal

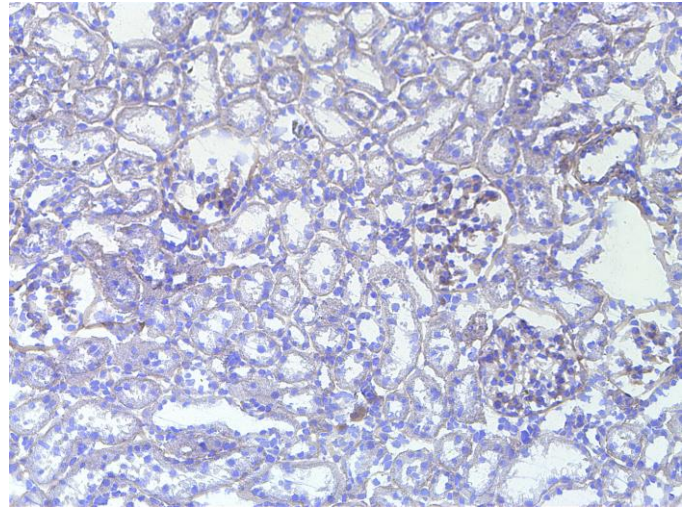

**Figure S4.** Representative micrographs of kidney cryosections from anti-Thy-1 nephritic and normal control rats stained with B-CHP, and further visualized with neutravidin-conjugated horseradish peroxidase (HRP). Tissue-bound CHP was visualized *via* the HRP-mediated chromogenic reaction using a DAB substrate. The cell nuclei were counter-stained with hematoxylin. Scale bar: 100  $\mu\text{m}$ .

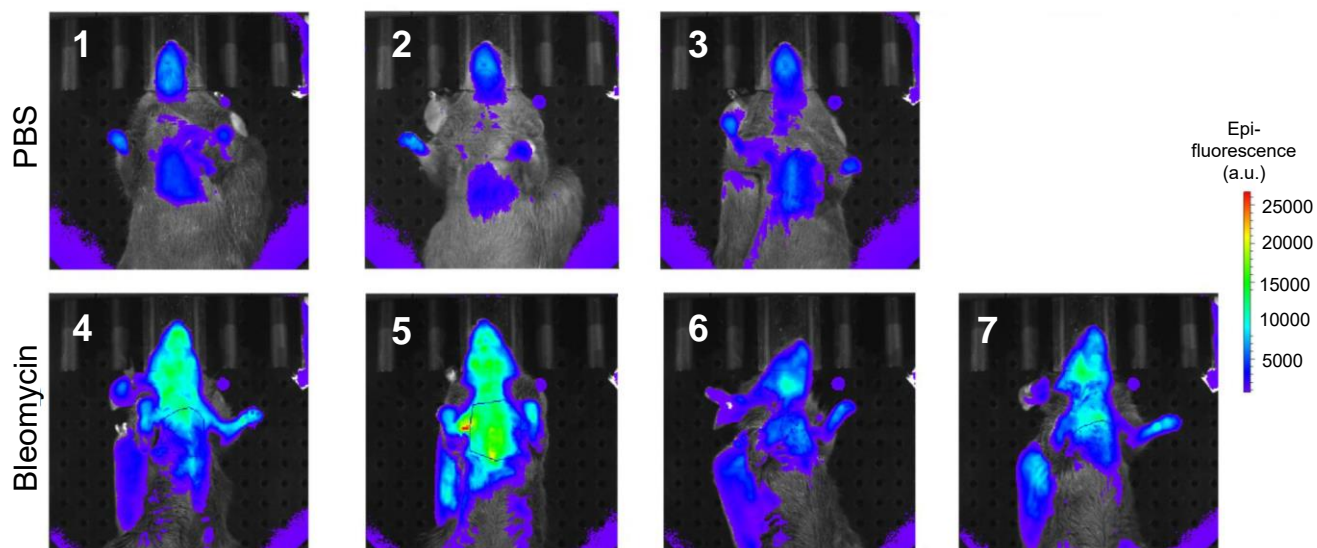

**Figure S5.** *In vivo* near-infrared epi-luminescence imaging of MMP activity in C57BL/6 mice which had been treated with bleomycin (bleomycin group,  $n = 4$ ) or PBS (PBS group,  $n = 3$ ) through subcutaneous minipumps for 3 weeks. The mice were administered 2 nmol of MMPsense 680 (PerkinElmer) through tail vein injection, and anesthetized with 2% isoflurane 24 h post injection. The surface fluorescence of the lungs was detected with an IVIS Spectrum imager [PerkinElmer, Ex/Em = 675/720 nm, Epi=illumination, Bin:(M)8, FOV: 6.6, f-stop 2, exposure 0.5 s]. Hair on the ventral surface of the thoracic region was removed with a depillator (Nair) at least 3 days prior to imaging. Remarkably higher signals were detected in the thoracic region of the bleomycin-treated mice, indicating elevated MMP activity. All images were acquired with identical instrument settings and set to the same scale (a.u. = arbitrary unit).

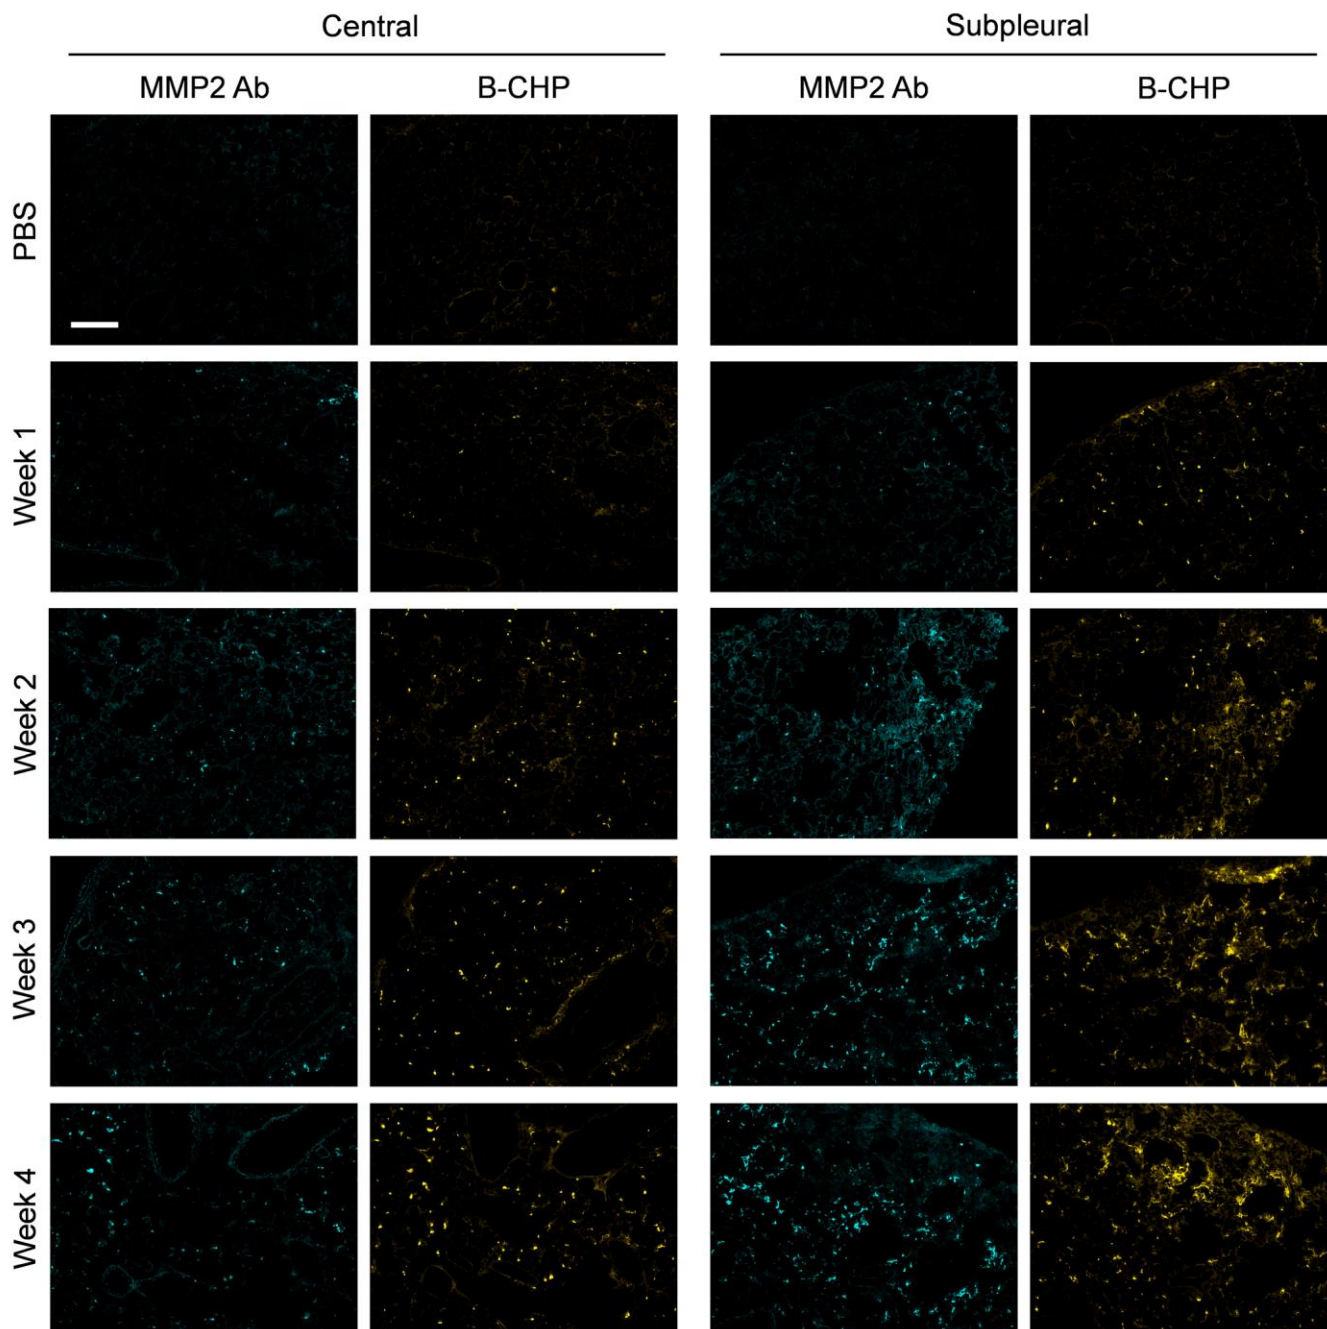

**Figure S6.** Representative fluorescence micrographs from the central and subpleural areas of lung cryosections harvested from bleomycin-treated or control mice dosed with PBS for 1 week. The tissues were double stained with B-CHP and an anti-MMP2 antibody followed by AlexaFluor647-labeled streptavidin and AlexaFluor555-labeled donkey anti-rabbit IgG H&L, respectively. The spatial distribution of the signals from the two probes are similar. Selected micrographs shown here are representative of images collected from 3 animals in each group. Scale bar: 200  $\mu\text{m}$ .

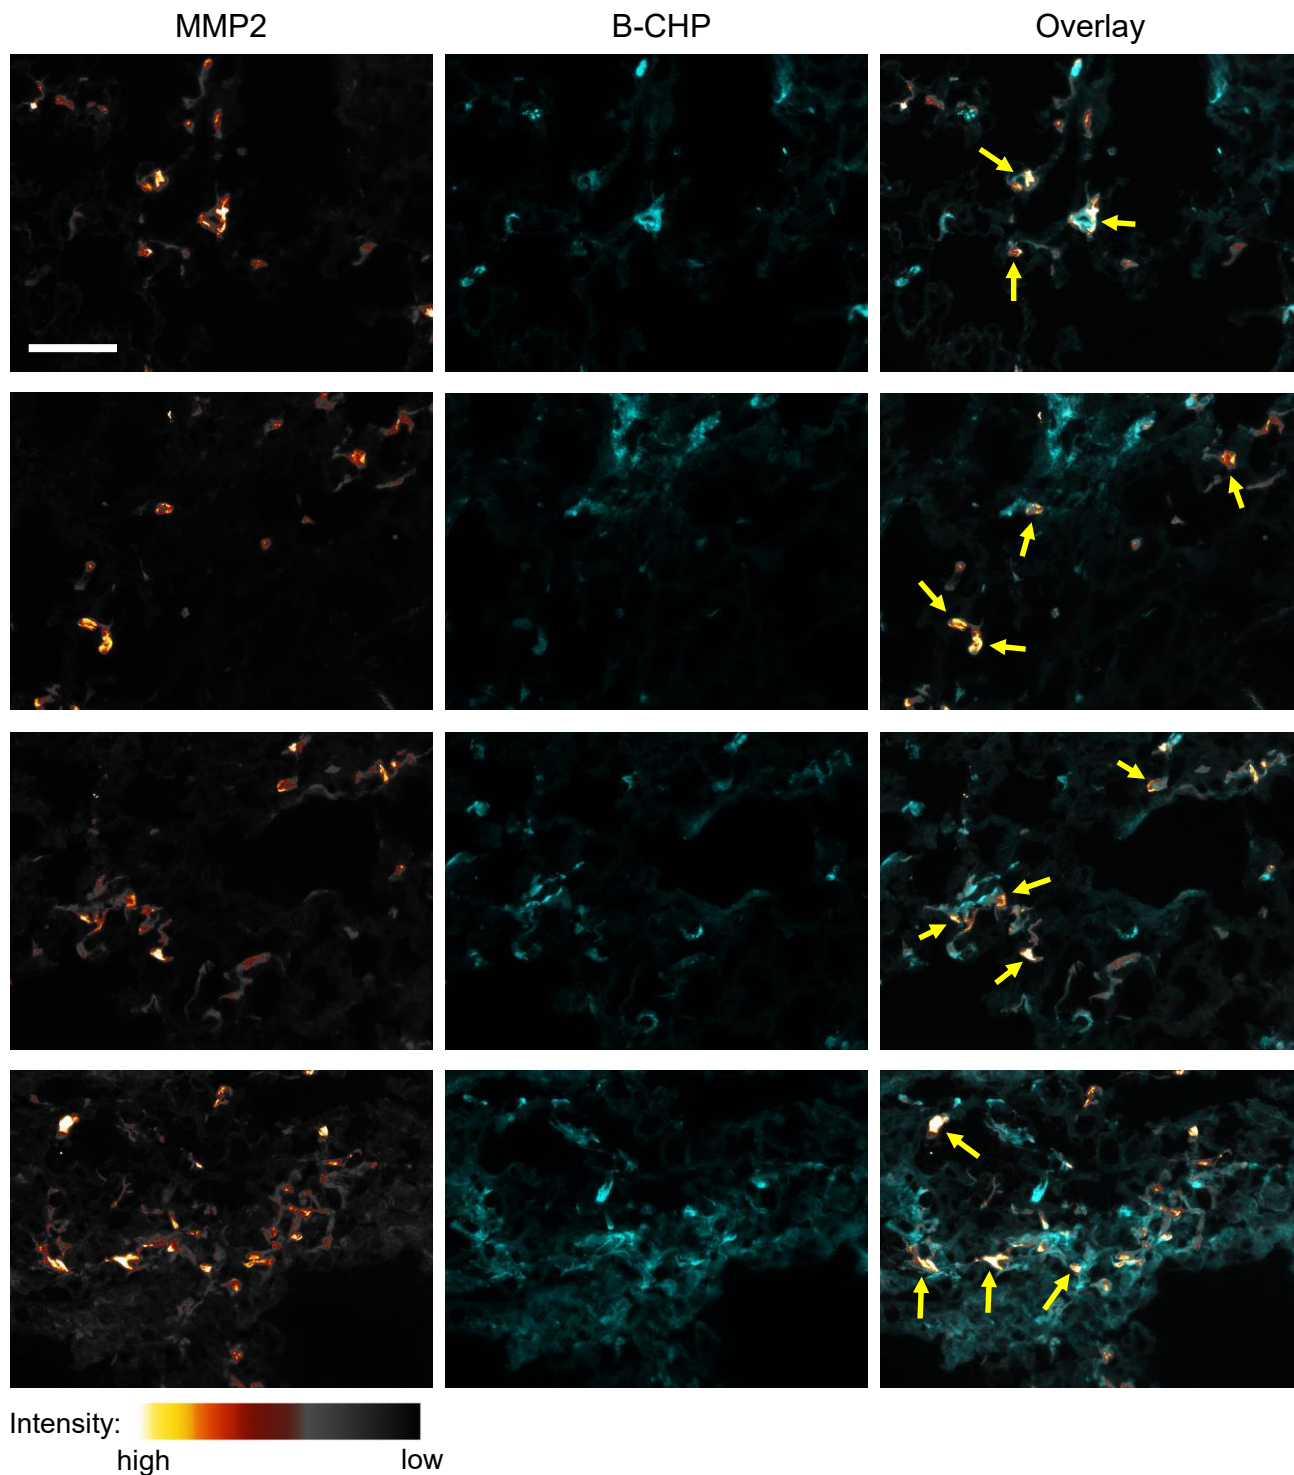

**Figure S7.** Micrographs showing multiple views of lung tissue (cryosections) harvested from the mice dosed with bleomycin for 3 weeks. The tissues were double-stained with B-CHP and an anti-MMP2 antibody followed by AlexaFluor647-labeled streptavidin and AlexaFluor555-labeled donkey anti-rabbit IgG H&L, respectively. Yellow arrows mark the locations where high MMP2 signals overlap with decreased CHP signals. Scale bar: 50  $\mu\text{m}$ .



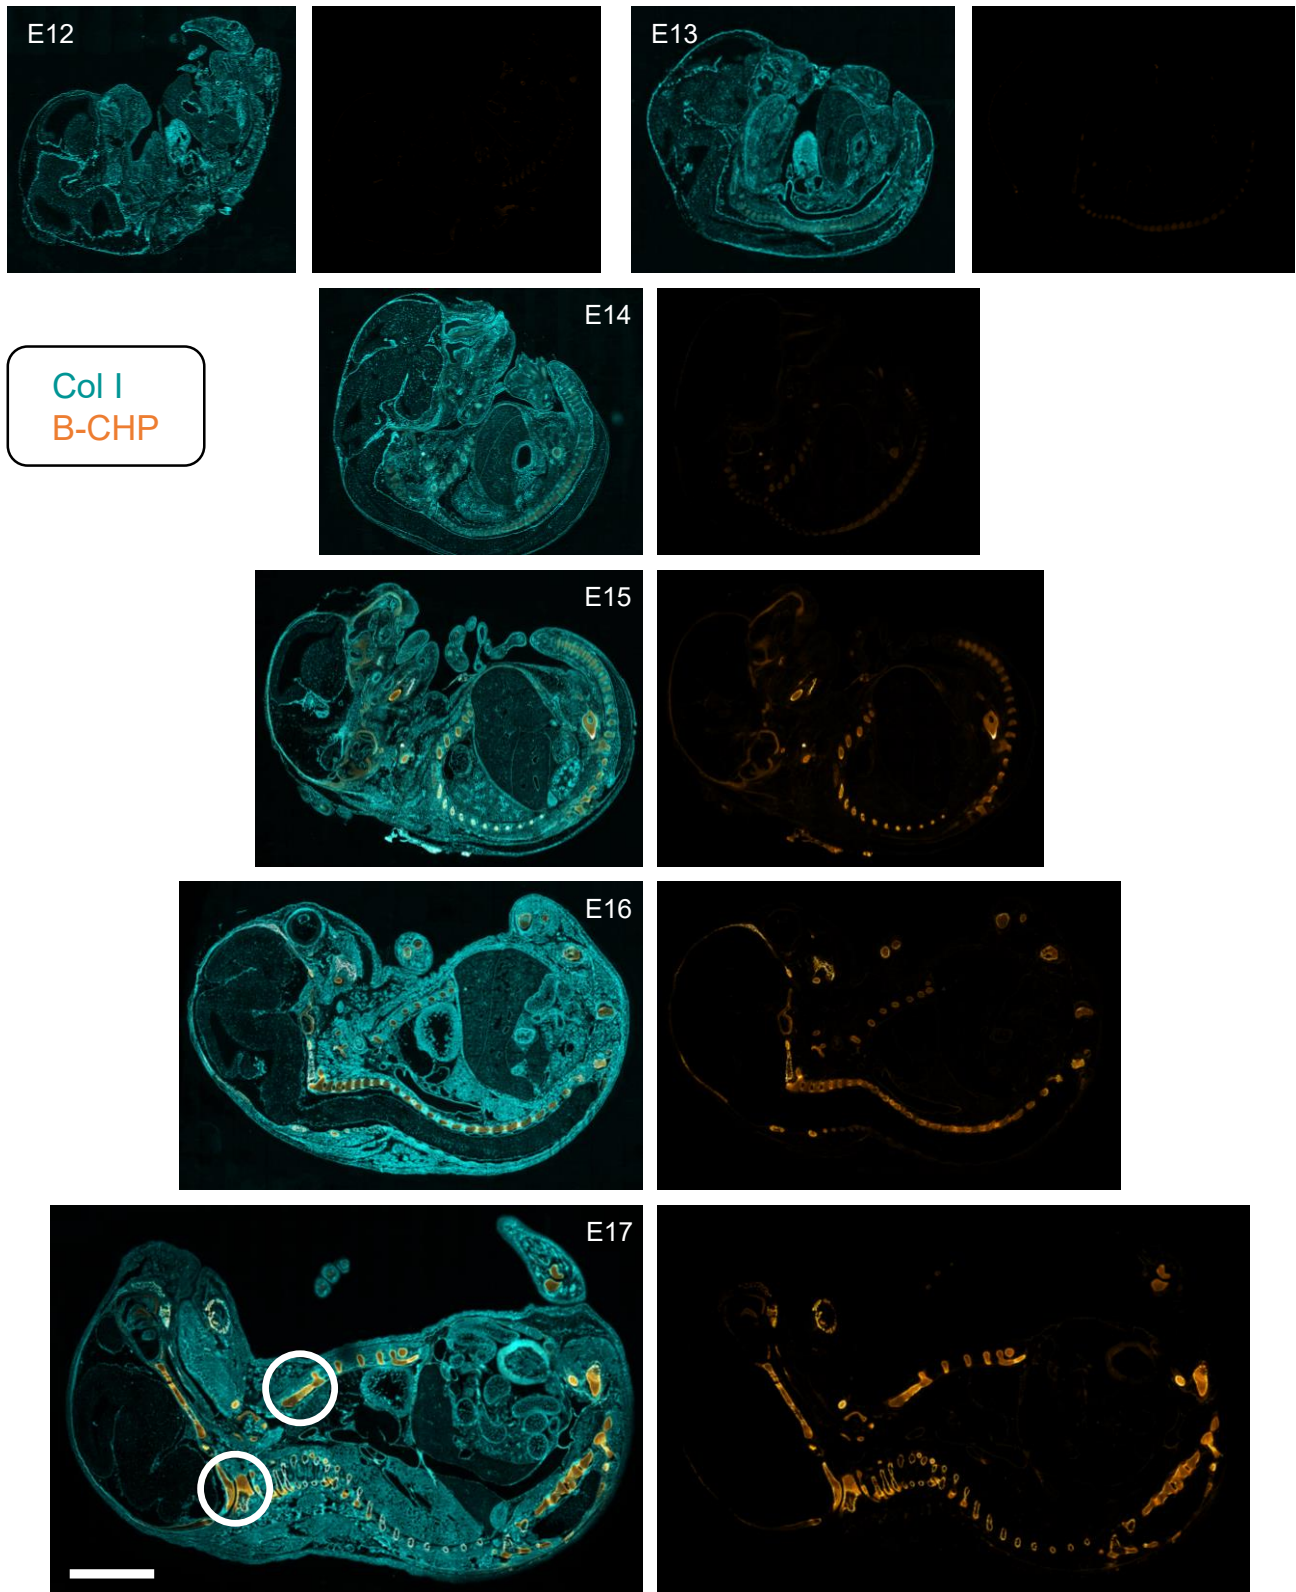

**Figure S8.** Localization of CHP binding in a series of sagittal cryosections of mouse embryos from 12 to 17 d.p.c. (labeled as E12-17) that were double-stained with B-CHP (detected by AlexaFluor647-streptavidin) and an anti-collagen I antibody (detected by AlexaFluor555-labeled donkey anti-rabbit IgG H&L). Regions in the circles in E17 are presented in magnified views in Fig. 6B. Scale bar: 3 mm.

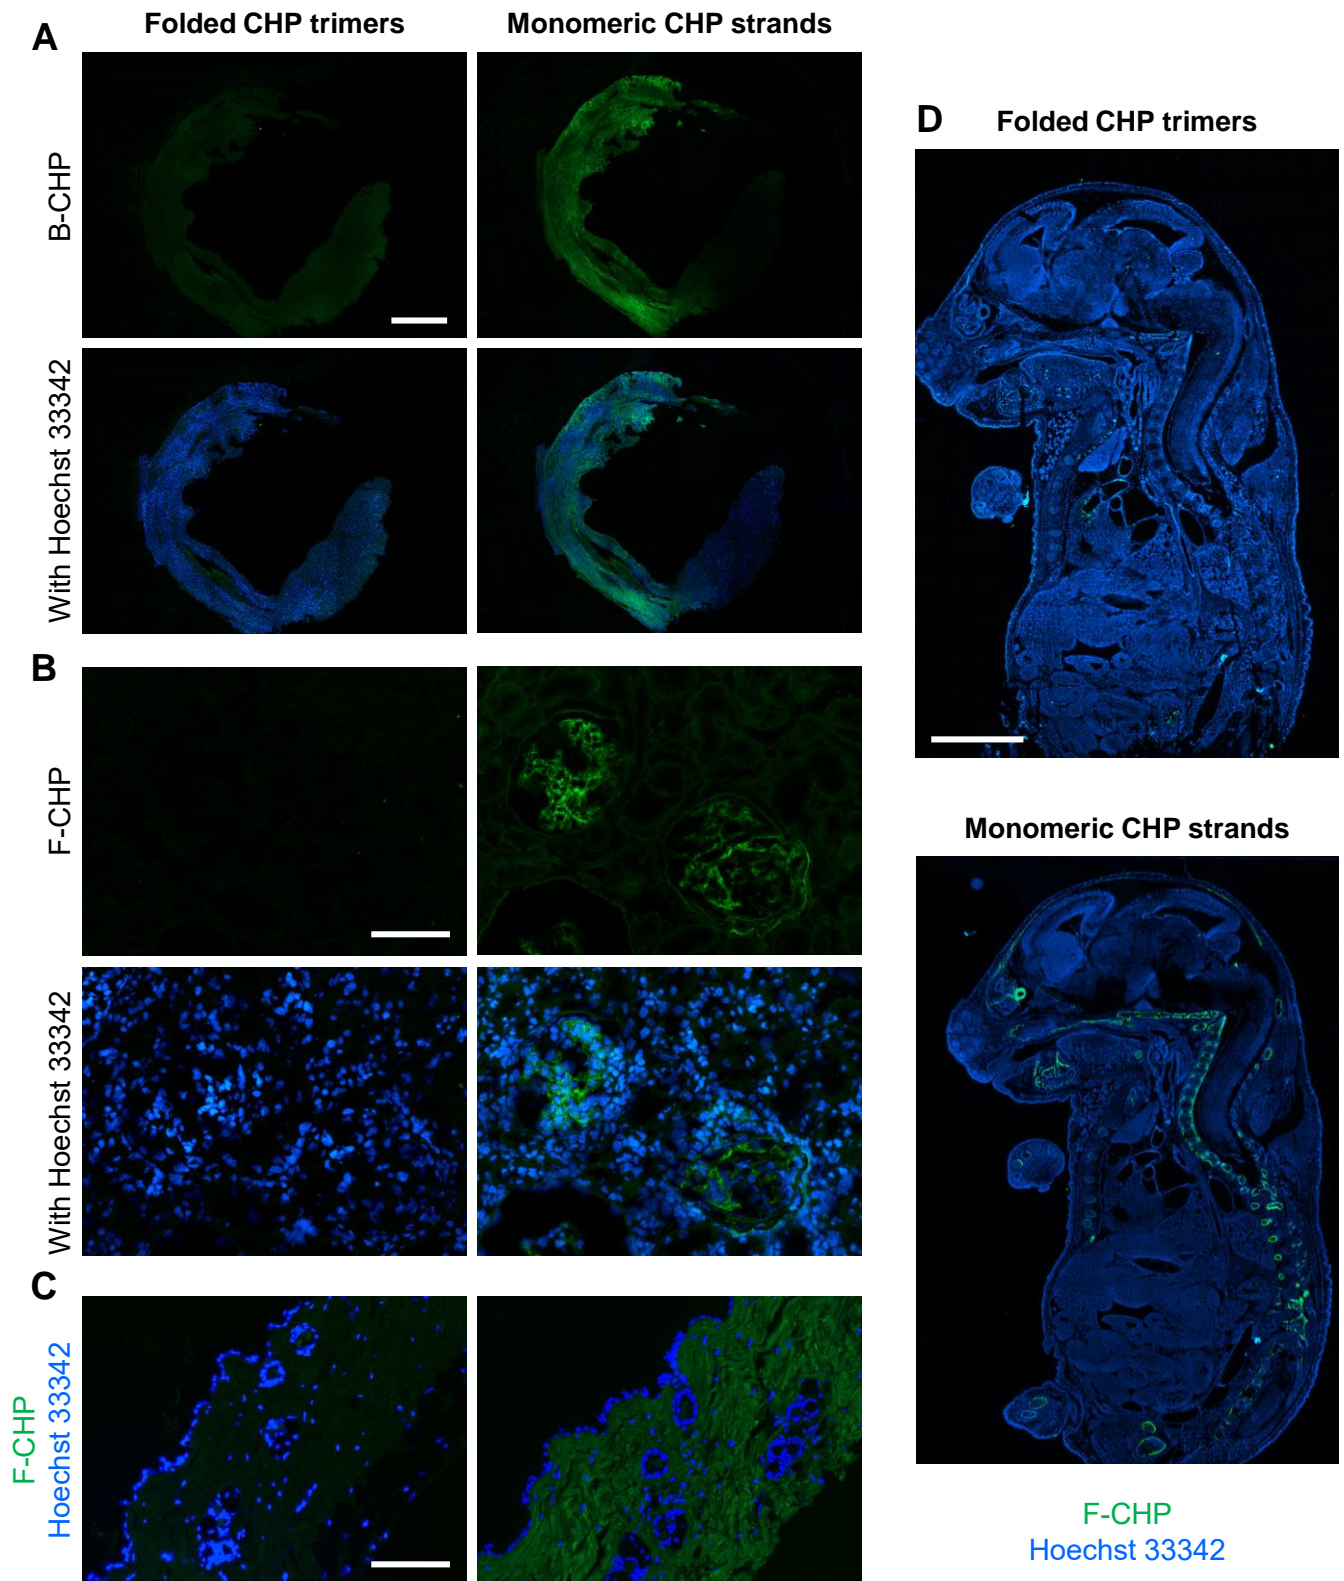

**Figure S9.** Neighboring sections from a formalin-fixed paraffin-embedded (FFPE) mouse heart harvested 7 days after myocardial infarction (A), a frozen nephritic rat kidney (B), frozen skin of a 9-month old mouse (C), and a frozen 18 d.p.c. mouse embryo (D) were stained with monomeric CHP strands or unheated, folded CHP trimers. CHP stock solutions (100  $\mu$ M) were incubated at 4  $^{\circ}$ C for days to allow adequate CHP self-trimerization, and the diluted solutions were directly added to tissue sections without heating. Cell nuclei were counter-stained with Hoechst 33342. B-CHP was detected using AlexaFluor647-streptavidin. Paired images in each panel were acquired under identical microscopic settings. Results are representative of three experiments for each group. Scale bars: 1 mm (A), 100  $\mu$ m (B, C), 3 mm (D).

| Sample                    |                             | W* | Endogenous biotin-blocking | W | CHP Primary antibody                                         | W | Streptavidin Secondary antibody                                                                                | W | Color development / Nuclei staining            | W | Data                  |         |
|---------------------------|-----------------------------|----|----------------------------|---|--------------------------------------------------------------|---|----------------------------------------------------------------------------------------------------------------|---|------------------------------------------------|---|-----------------------|---------|
| Human cartilage (frozen)  | Blocking with 5% goat serum |    |                            |   | F-CHP (15 $\mu$ M)                                           | ✓ |                                                                                                                |   | Hoechst                                        | ✓ | Fig. 2B               |         |
| Mouse heart (frozen)      |                             | ✓  | ✓                          | ✓ | B-CHP (15 $\mu$ M)                                           | ✓ | AlexaFluor647-streptavidin (0.005 mg/mL)                                                                       |   | Hoechst                                        | ✓ | Fig. 3A               |         |
| Mouse heart (frozen)      |                             | ✓  | ✓                          | ✓ | B-CHP (15 $\mu$ M)<br>anti-CD68 antibody (0.01 mg/mL)        | ✓ | AlexaFluor647-streptavidin (0.005 mg/mL),<br>Goat F(ab') <sub>2</sub> anti rat IgG: FITC (0.005 mg/mL)         |   | Hoechst                                        | ✓ | Fig. 3C, D            |         |
| Rat kidney (frozen)       |                             |    |                            |   | F-CHP (50 $\mu$ M)<br>anti-collagen IV antibody (0.01 mg/mL) | ✓ | AlexaFluor555 labeled donkey anti-rabbit<br>IgG H&L (0.002 mg/mL)                                              |   | Hoechst                                        | ✓ | Fig. 4B               |         |
| Mouse lung (frozen)       |                             |    |                            |   | F-CHP (15 $\mu$ M)<br>anti-MMP2 antibody (0.01 mg/mL)        | ✓ | AlexaFluor555 labeled donkey anti-rabbit<br>IgG H&L (0.005 mg/mL)                                              |   | Hoechst                                        | ✓ | Fig. 5A               |         |
| Mouse lung (frozen)       |                             | ✓  | ✓                          | ✓ | B-CHP (15 $\mu$ M)<br>anti-MMP2 antibody (0.01 mg/mL)        | ✓ | AlexaFluor647-streptavidin (0.005 mg/mL),<br>AlexaFluor555 labeled donkey anti-rabbit<br>IgG H&L (0.005 mg/mL) |   | Hoechst                                        | ✓ | Fig. 5C, Fig. S6 & S7 |         |
| Mouse embryo (frozen)     |                             | ✓  | ✓                          | ✓ | B-CHP (15 $\mu$ M)<br>anti-collagen I antibody (0.005 mg/mL) | ✓ | AlexaFluor647-streptavidin (0.005 mg/mL)<br>AlexaFluor555 labeled donkey anti-rabbit<br>IgG H&L (0.005 mg/mL)  |   | Hoechst                                        | ✓ | Fig. 6, Fig. S8       |         |
| Mouse skin (FFPE)         |                             | ✓  | ✓                          | ✓ | B-CHP (15 $\mu$ M)                                           | ✓ | AlexaFluor647-streptavidin (0.005 mg/mL)                                                                       |   | Hoechst                                        | ✓ | Fig. 7A               |         |
| Mouse skin (frozen)       |                             |    |                            |   | F-CHP (15 $\mu$ M)                                           | ✓ |                                                                                                                |   |                                                |   |                       | Fig. 7B |
| Porcine ligament (frozen) |                             |    |                            |   | F-CHP                                                        | ✓ |                                                                                                                |   |                                                |   |                       | Fig. S2 |
| Mouse heart (FFPE)        |                             | ✓  | ✓                          | ✓ | B-CHP (15 $\mu$ M)                                           | ✓ | AlexaFluor647-streptavidin (0.005 mg/mL)                                                                       |   | Hoechst                                        | ✓ | Fig. S3               |         |
| Rat kidney (frozen)       |                             | ✓  | ✓                          | ✓ | B-CHP (15 $\mu$ M)                                           | ✓ | neutravidin-HRP (0.002 mg/mL)                                                                                  | ✓ | DAB peroxidase substrate kit,<br>hematoxylin** | ✓ | Fig. S4               |         |

**Table S1.** The specific protocol steps for antibody and CHP staining in each histological experiment.

\*W, washing: the slides were incubated in 100 mL of PBS at room temperature for three 5-min cycles to remove unbound materials.

\*\*The DAB color development and the hematoxylin counterstain procedures were performed following the manufacturer's recommendation.
